# Supplementary material for: Long-Term Advantages of Ovarian Reserve Maintenance and Follicle Development Using Adipose Tissue-Derived Stem Cells in Ovarian Tissue Transplantation
Source: PubMed Central journal article supplement (PMC7564479; doi:10.3390/jcm9092980), 2020-09-15
Supplement: jcm-09-02980-s001.pdf [file jcm-09-02980-s001.pdf]

## Supplementary materials 1. Immunostaining protocols

### *ER $\alpha$ immunostaining protocol*

Sections were deparaffinized with Histosafe (Yvsolab SA, Turnhout, Belgium) and rehydrated in 2-propanol (Merck, Darmstadt, Germany). After blocking endogenous peroxidase activity with 3% H<sub>2</sub>O<sub>2</sub> and demasking in citrate buffer (pH 6) for 75 min at 98 °C, nonspecific binding sites were blocked by incubation with normal goat serum for 30 min. Sections were first incubated overnight at 4 °C with rabbit polyclonal anti-ER $\alpha$  antibody (1:400, MC-20 SC-542, Santa Cruz, CA, USA) and then for 1 h at room temperature with Envision rabbit HRP (1:1, K4003, Dako, Carpinteria, CA, USA). Diaminobenzidine (Dako, Carpinteria, CA, USA) was used as a chromogen and hematoxylin as a counterstain.

### *ER $\beta$ immunostaining protocol*

Sections were deparaffinized with Histosafe (Yvsolab SA, Turnhout, Belgium) and rehydrated in 2-propanol (Merck, Darmstadt, Germany). After blocking endogenous peroxidase activity with 3% H<sub>2</sub>O<sub>2</sub> and demasking in citrate buffer (pH 6) for 75 min at 98 °C, nonspecific binding sites were blocked by incubation with normal goat serum for 30 min. Sections were first incubated overnight at 4 °C with rabbit polyclonal anti-ER $\beta$  antibody (1:300, H-150 SC-8974, Santa Cruz, CA, USA) and then for 1 h at room temperature with Envision rabbit HRP (1:1, K4003, Dako, Carpinteria, CA, USA). Diaminobenzidine (Dako, Carpinteria, CA, USA) was used as a chromogen and hematoxylin as a counterstain.

### *AMH immunostaining protocol*

Sections were deparaffinized with Histosafe (Yvsolab SA, Turnhout, Belgium) and rehydrated in 2-propanol (Merck, Darmstadt, Germany). After blocking endogenous peroxidase activity with 3% H<sub>2</sub>O<sub>2</sub> and demasking in citrate buffer (pH 6) for 75 min at 98 °C, nonspecific binding sites were blocked by incubation with normal goat serum for 30 min. Sections were first incubated overnight at 4 °C with mouse anti-human AMH (1:100, MCA2246, Serotec, Gentaur, Kampenhout, Belgium) and then for 1 h at room temperature with Envision mouse HRP (1:2, K4001, Dako, Carpinteria, CA, USA). Diaminobenzidine (Dako, Carpinteria, CA, USA) was used as a chromogen and hematoxylin as a counterstain.

### *AMHRII immunostaining protocol*

Sections were deparaffinized with Histosafe (Yvsolab SA, Turnhout, Belgium) and rehydrated in 2-propanol (Merck, Darmstadt, Germany). After blocking endogenous peroxidase activity with 3% H<sub>2</sub>O<sub>2</sub> and demasking in citrate buffer (pH 6) for 75 min at 98 °C, nonspecific binding sites were blocked by incubation with normal goat serum for 30 min. Sections were first incubated overnight at 4 °C with rabbit polyclonal AMHRII (1:200, 36093 Signalway Antibody, College Park, MD, USA) and then for 1 h at room temperature with Envision rabbit HRP (1:2, K4003, Dako, Carpinteria, CA, USA). Diaminobenzidine (Dako, Carpinteria, CA, USA) was used as a chromogen and hematoxylin as a counterstain.

**Supplementary Table S1.** Total and per patient follicle count in non-grafted controls, the 2-step/ASCs+OT group, and the OT group.

| Patients. | Non-grafted controls |            |         |           | 6-month transplantation |            |         |           |        |   |
|-----------|----------------------|------------|---------|-----------|-------------------------|------------|---------|-----------|--------|---|
|           | Total                | Primordial | Primary | Secondary | Total                   | Primordial | Primary | Secondary | Antral |   |
| 1         | 52                   | 46         | 6       | 0         | 2-step/ASCs+OT          | 3          | 2       | 1         | 0      | 0 |
|           |                      |            |         |           | OT                      | 0          | 0       | 0         | 0      | 0 |
| 2         | 10                   | 8          | 2       | 0         | 2-step/ASCs+OT          | 43         | 27      | 3         | 5      | 8 |
|           |                      |            |         |           | OT                      | 0          | 0       | 0         | 0      | 0 |
| 3         | 54                   | 29         | 13      | 12        | 2-step/ASCs+OT          | 15         | 5       | 4         | 5      | 1 |
|           |                      |            |         |           | OT                      | 18         | 1       | 6         | 7      | 2 |
| 4         | 64                   | 51         | 12      | 1         | 2-step/ASCs+OT          | 60         | 30      | 12        | 9      | 9 |
|           |                      |            |         |           | OT                      | 19         | 6       | 6         | 5      | 2 |
| 5         | 14                   | 7          | 5       | 2         | 2-step/ASCs+OT          | 0          | 0       | 0         | 0      | 0 |
|           |                      |            |         |           | OT                      | 1          | 0       | 0         | 1      | 0 |
| 6         | 12                   | 10         | 2       | 0         | 2-step/ASCs+OT          | 47         | 32      | 4         | 7      | 4 |
|           |                      |            |         |           | OT                      | 19         | 5       | 0         | 7      | 7 |
| 7         | 4                    | 4          | 0       | 0         | 2-step/ASCs+OT          | 1          | 1       | 0         | 0      | 0 |
|           |                      |            |         |           | OT                      | 2          | 1       | 0         | 1      | 0 |
|           | 210                  | 155        | 40      | 15        | 169                     | 97         | 24      | 26        | 22     |   |
|           |                      |            |         |           | 57                      | 13         | 12      | 21        | 11     |   |
